# Supplementary material for: Statin Therapy Is Associated With a Lower Risk of Heart Failure in Patients With Atrial Fibrillation: A Population‐Based Study
Source: PubMed Central journal article supplement — J Am Heart Assoc. 2023 Nov 28;12(23):e032378. doi: 10.1161/JAHA.123.032378 (PMC10727318; doi:10.1161/jaha.123.032378), 2023-11-28
Supplement: JAH3-12-e032378-s001.pdf [file JAH3-12-e032378-s001.pdf]

# **SUPPLEMENTAL MATERIAL**

Table S1. Definition of covariates

| Entity                       | Definition                                      |
|------------------------------|-------------------------------------------------|
| Atrial fibrillation          | ICD-9: 427.31                                   |
| Heart Failure                | ICD-9: 402, 404, 425, 428                       |
| Diabetes                     | ICD-9: 250                                      |
| Hypertension                 | ICD-9: 401-405                                  |
| Ischemic stroke              | ICD-9: 430-434,436-438                          |
| Transient Ischaemic Attack   | ICD-9: 435                                      |
| Coronary Artery Disease      | ICD-9: 410-414                                  |
| Chronic Kidney Disease       | ICD-9: 585                                      |
| Peripheral Vascular Disease  | ICD-9: 440-444, 447                             |
| Venous Thromboembolism       | ICD-9: 415.1, 451, 453                          |
| Rheumatoid Arthritis         | ICD-9: 714                                      |
| Ankylosing Spondylitis       | ICD-9: 720-724                                  |
| Systemic Sclerosis           | ICD-9: 710.1                                    |
| Systemic Lupus Erythematosus | ICD-9: 710.0                                    |
| Liver cirrhosis              | ICD-9: 571.2, 571.5, 571.6, 572.2, 572.3, 572.4 |
| Anaemia                      | ICD-9: 280,281-285                              |
| Cancer                       | ICD-9: 140-239                                  |
| Gastrointestinal Bleeding    | ICD-9: 456.0, 531-533, 578                      |
| Dyslipidaemia                | ICD-9: 272, 272.1, 272.2, 272.3, 272.4          |
| Obesity                      | ICD-9: 278                                      |
| Smoke                        | ICD-9: 491, 492, 496                            |

Abbreviation: ICD, international classification of disease.

Table S2. Events of incident heart failure, heart failure-related death and all-cause mortality among statin users and nonusers.

|                                           | Overall      | Statin users | Statin nonusers |
|-------------------------------------------|--------------|--------------|-----------------|
| <b>Heart failure, N (%)</b>               | 9,268 (17.7) | 3,673 (15.8) | 5,595 (19.1)    |
| Incidence rate per 100-person years       | 3.75         | 3.40         | 4.03            |
| <b>Heart failure-related death, N (%)</b> | 1,620 (3.1)  | 661 (2.8)    | 959 (3.3)       |
| Incidence rate per 100-person years       | 0.66         | 0.61         | 0.69            |
| <b>All-cause mortality, N (%)</b>         | 23282 (44.4) | 9,537 (41.0) | 13,745 (46.9)   |
| Incidence rate per 100-person years       | 9.43         | 8.83         | 9.89            |

Abbreviation: N, number

Table S3. Characteristics of the inverse probability of treatment weighting treated cohort.

|                                                   | Statin nonuser<br>N=17,043.5 | Statin user<br>N=17,437.2 |
|---------------------------------------------------|------------------------------|---------------------------|
| Age (SD)                                          | 74.77 (13.25)                | 74.71 (10.75)             |
| Female, N (%)                                     | 8091.5 (47.5)                | 8263.6 (47.4)             |
| Smoking, N (%)                                    | 1059.0 ( 6.2)                | 1102.3 ( 6.3)             |
| CHA <sub>2</sub> DS <sub>2</sub> -VASc score (SD) | 2.79 (1.57)                  | 3.12 (1.61)               |
| Medical conditions, N (%)                         |                              |                           |
| Diabetes                                          | 7499.6 (44.0)                | 7733.7 (44.4)             |
| Hypertension                                      | 4334.8 (25.4)                | 4467.4 (25.6)             |
| Ischemic stroke                                   | 1794.9 (10.5)                | 1859.4 (10.7)             |
| TIA                                               | 355.1 ( 2.1)                 | 376.9 ( 2.2)              |
| CAD                                               | 2149.7 (12.6)                | 2327.9 (13.3)             |
| CKD                                               | 634.7 ( 3.7)                 | 661.1 ( 3.8)              |
| PVD                                               | 580.9 ( 3.4)                 | 604.2 ( 3.5)              |
| VTE                                               | 155.2 ( 0.9)                 | 159.4 ( 0.9)              |
| Autoimmune diseases*                              | 2250.5 (13.2)                | 2322.6 (13.3)             |
| Liver cirrhosis                                   | 67.8 ( 0.4)                  | 69.1 ( 0.4)               |
| Anaemia                                           | 1422.4 ( 8.3)                | 1475.4 ( 8.5)             |
| Cancer                                            | 2552.2 (15.0)                | 2620.1 (15.0)             |
| GIB                                               | 1783.1 (10.5)                | 1837.9 (10.5)             |
| Dyslipidaemia                                     | 1216.1 ( 7.1)                | 1324.9 ( 7.6)             |
| Obesity                                           | 126.2 ( 0.7)                 | 131.5 ( 0.8)              |
| Medication use, N (%)                             |                              |                           |
| NOAC                                              | 7903.2 (46.4)                | 8037.0 (46.1)             |
| Warfarin                                          | 3812.2 (22.4)                | 3858.9 (22.1)             |
| Aspirin                                           | 7923.1 (46.5)                | 8135.6 (46.7)             |
| Beta Blockers                                     | 5390.1 (31.6)                | 5501.5 (31.6)             |
| ACEI/ARB                                          | 8448.0 (49.6)                | 8680.7 (49.8)             |
| Procedure, N (%)                                  |                              |                           |
| Ablation (%)                                      | 101.6 ( 0.6)                 | 103.5 ( 0.6)              |
| Cardioversion (%)                                 | 63.0 ( 0.4)                  | 63.6 ( 0.4)               |

Abbreviation: N, number; IPTW, inverse probability of treatment weighting; SD, standard deviation; TIA, transient ischaemic attack; CAD, coronary artery disease; CKD, chronic kidney disease; PVD, peripheral vascular disease; VTE, venous thromboembolism; GIB, gastrointestinal bleeding; NOAC, non-vitamin K antagonist oral anticoagulant; ACEI/ARB, angiotensin-converting enzyme/ angiotensin II

receptor blocker.

\*Autoimmune diseases include rheumatoid arthritis, systemic sclerosis, systemic lupus erythematosus, ankylosing spondylitis.

Table S4. Association between LDL levels and heart failure (N=48,558).

| LDL level<br>(mmol/L)          | Total / HF event (%)              | *SHR (95% CI) P          |                         |
|--------------------------------|-----------------------------------|--------------------------|-------------------------|
|                                |                                   | Unadjusted               | †Adjusted               |
| <b>As continuous variable</b>  |                                   |                          |                         |
|                                | 48,558/8685<br>(17.9%)            | 1.09 (1.07-1.11) <0.001  | 1.07 (1.05-1.09) <0.001 |
| <b>As categorical variable</b> |                                   |                          |                         |
| <1.8                           | 9,424 (19.4%) /<br>1,745 (18.5%)  | 1.00(Ref.)               | 1.00(Ref.)              |
| 1.8-2.6                        | 19,045 (39.2%) /<br>3,354 (17.6%) | 1.06 (1.01-1.11) 0.01    | 1.03 (0.98-1.08) 0.15   |
| >2.6                           | 20,089 (41.4%) /<br>3,586 (17.9%) | 1.17 (1.12 -1.22) <0.001 | 1.11 (1.07-1.17) <0.001 |

Abbreviation: LDL, low density lipoprotein; N, number; HF, heart failure; SHR, subdistribution hazard ratio; CI, confidence interval; Ref, reference.

\*Subdistribution hazard estimates were obtained with the use of a proportional subdistribution hazards regression model fit to the inverse probability of treatment weighted with competing risks.

†A multivariable adjusted model further accounted for the following prognostic covariates: age at index date, sex, smoking, CHA<sub>2</sub>DS<sub>2</sub>-VASc score, comorbidities, including diabetes, hypertension, ischemic stroke, transient ischaemic attack, coronary artery disease, chronic kidney disease, peripheral vascular disease, venous thromboembolism, rheumatoid arthritis, systemic sclerosis, systemic lupus erythematosus, ankylosing spondylitis, liver cirrhosis, anaemia, cancer, gastrointestinal bleeding, dyslipidaemia, obesity and baseline use of non-vitamin K antagonist oral anticoagulant, warfarin, aspirin, beta-blockers, angiotensin-converting enzyme inhibitors/angiotensin receptor blockers, ablation, cardioversion.

Table S5. Effect of statin use between all-cause mortality and heart failure related death.

|                                    | Event number    | Incident rate | Unadjusted<br>*HR (95%CI) P | †Adjusted<br>HR (95%CI) P |
|------------------------------------|-----------------|---------------|-----------------------------|---------------------------|
| <b>All-cause mortality</b>         |                 |               |                             |                           |
| Statin nonusers<br>N=29,251        | 13,745<br>(47%) | 9.89          | Ref                         | Ref                       |
|                                    |                 |               | 0.88                        | 0.85                      |
| Statin users<br>N=23,239           | 9,537<br>(41%)  | 8.83          | (0.86-0.90)<br><0.001       | (0.82-0.87)<br><0.001     |
| <b>Heart failure-related death</b> |                 |               |                             |                           |
| Statin nonusers<br>N=29,251        | 959<br>(3.3%)   | 0.69          | Ref                         | Ref                       |
|                                    |                 |               | 0.88                        | 0.85                      |
| Statin users<br>N=23,239           | 661<br>(2.8%)   | 0.61          | (0.79-0.97)<br>0.009        | (0.76-0.94)<br>0.002      |

Abbreviation: HR, hazard ratio; CI, confidence interval; N, number; Ref, reference.

\*Hazard estimates were obtained with the use of a conventional Cox proportional hazards regression model fit to the inverse probability of treatment weighted.

†A multivariable adjusted model further accounted for the following prognostic covariates: age at index date, sex, smoking, CHA<sub>2</sub>DS<sub>2</sub>-VAsC score, comorbidities, including diabetes, hypertension, ischemic stroke, transient ischaemic attack, coronary artery disease, chronic kidney disease, peripheral vascular disease, venous thromboembolism, rheumatoid arthritis, systemic sclerosis, systemic lupus erythematosus, ankylosing spondylitis, liver cirrhosis, anaemia, cancer, gastrointestinal bleeding, dyslipidaemia, obesity and baseline use of non-vitamin K antagonist oral anticoagulant, warfarin, aspirin, beta-blockers, angiotensin-converting enzyme inhibitors/angiotensin receptor blockers, ablation, cardioversion.

Table S6. Sensitivity analysis for the association between statin use and risk of incident heart failure.

| Model                                                                       | Statin nonuser | Statin user                |
|-----------------------------------------------------------------------------|----------------|----------------------------|
| <b>IPTW treated</b>                                                         | N=17,043.5     | N=17437.2                  |
| Unadjusted SHR (95%CI) P                                                    | 1              | 0.84 (0.81-0.87)<br><0.001 |
| Age and sex adjusted SHR (95%CI) P                                          | 1              | 0.82 (0.80-0.84)<br><0.001 |
| Multivariable adjusted SHR (95%CI) P                                        | 1              | 0.81 (0.78-0.85)<br><0.001 |
| <b>Competing risks without propensity score consideration SHR (95%CI) P</b> | 1              | 0.74 (0.70-0.77)<br><0.001 |
| <b>Conventional multivariable Cox regression HR(95%CI) P</b>                | 1              | 0.75 (0.71-0.78)<br><0.001 |
| <b>Propensity score regressed</b>                                           | N=17,173       | N=17,173                   |
| Unadjusted SHR (95%CI) P                                                    | 1              | 0.72 (0.70-0.76)<br><0.001 |
| Age and sex adjusted SHR (95%CI) P                                          | 1              | 0.73 (0.70-0.76)<br><0.001 |
| Multivariable adjusted SHR (95%CI) P                                        | 1              | 0.75 (0.71-0.79)<br><0.001 |

Abbreviations: IPTW, inverse probability of treatment weighting; SHR, subdistribution hazard ratio; HR, hazard ratio; CI, confidential interval.

Subdistribution hazard estimates were obtained with the use of a proportional subdistribution hazards regression model fit to the inverse probability of treatment weighted with or without competing risks



Table S7. Characteristics of the alternative propensity score matched cohort according to statin use

|                                                   | Statin nonuser<br>N=17,173 | Statin user<br>N=17,173 |
|---------------------------------------------------|----------------------------|-------------------------|
| Age (SD)                                          | 74.76 (12.17)              | 75.67 (10.94)           |
| Female, N (%)                                     | 8172 (47.6)                | 8225 (47.9)             |
| Smoking, N (%)                                    | 1046 ( 6.1)                | 1178 ( 6.9)             |
| CHA <sub>2</sub> DS <sub>2</sub> -VASc score (SD) | 2.84 (1.60)                | 3.00 (1.66)             |
| Medical conditions, N (%)                         |                            |                         |
| Diabetes                                          | 7666 (44.6)                | 7290 (42.5)             |
| Hypertension                                      | 4394 (25.6)                | 4911 (28.6)             |
| Ischemic stroke                                   | 1831 (10.7)                | 2414 (14.1)             |
| TIA                                               | 358 ( 2.1)                 | 479 ( 2.8)              |
| CAD                                               | 2175 (12.7)                | 2620 (15.3)             |
| CKD                                               | 645 ( 3.8)                 | 849 ( 4.9)              |
| PVD                                               | 586 (3.4)                  | 809 (4.7)               |
| VTE                                               | 143 (0.8)                  | 166 (1.0)               |
| Autoimmune diseases*                              | 2240 (13.0)                | 2348 (13.7)             |
| Liver cirrhosis                                   | 64 ( 0.4)                  | 68 ( 0.4)               |
| Anaemia                                           | 1366 (8.0)                 | 1641 (9.6)              |
| Cancer                                            | 2563 (14.9)                | 2690 (15.7)             |
| GIB                                               | 1749 (10.2)                | 1969 (11.5)             |
| Dyslipidaemia                                     | 1228 ( 7.2)                | 1816 (10.6)             |
| Obesity                                           | 126 ( 0.7)                 | 144 ( 0.8)              |
| Medication use, N (%)                             |                            |                         |
| NOAC                                              | 8338 (48.6)                | 7030 (40.9)             |
| Warfarin                                          | 3863 (22.5)                | 3812 (22.2)             |
| Aspirin                                           | 8138 (47.4)                | 8502 (49.5)             |
| Beta Blockers                                     | 5485 (31.9)                | 5428 (31.6)             |
| ACEI/ARB                                          | 8702 (50.7)                | 8726 (50.8)             |
| Procedure, N (%)                                  |                            |                         |
| Ablation (%)                                      | 105 (0.6)                  | 98 (0.6)                |
| Cardioversion (%)                                 | 54 ( 0.3)                  | 60 ( 0.3)               |

Abbreviation: N, number; IPTW, inverse probability of treatment weighting; SD, standard deviation; TIA, transient ischaemic attack; CAD, coronary artery disease; CKD, chronic kidney disease; PVD, peripheral vascular disease; VTE, venous thromboembolism; GIB, gastrointestinal bleeding; NOAC, non-vitamin K antagonist oral anticoagulant; ACEI/ARB, angiotensin-converting enzyme/ angiotensin II

receptor blocker.

\*Autoimmune diseases include rheumatoid arthritis, systemic sclerosis, systemic lupus erythematosus, ankylosing spondylitis.

Table S8. The association between statin new user\* and risk of incident heart failure and heart failure-related death after 1:1 propensity score matching (N=7740).

|                                           | Statin nonuser<br>(N=3870) | Statin new user<br>(N=3870) |
|-------------------------------------------|----------------------------|-----------------------------|
| <b>Incident heart failure, N (%)</b>      | 742 (19.2%)                | 623 (16.1%)                 |
| Unadjusted SHR (95% CI)                   | 1                          | 0.68 (0.62-0.74)            |
| Age and sex adjusted SHR (95% CI)         | 1                          | 0.71 (0.65-0.78)            |
| Multivariable adjusted SHR (95% CI)       | 1                          | 0.70 (0.64-0.77)            |
| <b>Heart failure-related death, N (%)</b> | 103 (2.7%)                 | 96 (2.5%)                   |
| Unadjusted SHR (95% CI)                   | 1                          | 0.78 (0.71-0.85)            |
| Age and sex adjusted SHR (95% CI)         | 1                          | 0.78 (0.72-0.86)            |
| Multivariable adjusted SHR (95% CI)       | 1                          | 0.75 (0.68-0.82)            |

Abbreviation: N, number; SHR, subdistribution hazard ratio; CI, confidential interval.

\*We excluded all patients with a history of statin use prior to the index date and statin new user was defined as never use of statin before index date.

Subdistribution hazard estimates were obtained with the use of a proportional subdistribution hazards regression model fit to the 1:1 propensity score matching cohort that accounted for competing risks.

Table S9. Association between statin use and a negative control outcome: incident gastrointestinal bleeding

| Event                                | Statin nonusers (Ref.)<br>(N=29,251) | Statin users<br>(N=23,239) | P     |
|--------------------------------------|--------------------------------------|----------------------------|-------|
| Incident gastrointestinal bleeding   |                                      |                            |       |
| Number with event, N (%)             | 2,272 (7.8)                          | 1,674 (7.2)                | 0.14  |
| Incidence rate per 100-person years  | 1.64                                 | 1.55                       | <0.01 |
| Unadjusted *SHR (95% CI)             | 1                                    | 1.03 (0.97-1.10)           | 0.34  |
| †Multivariable adjusted SHR (95% CI) | 1                                    | 1.01 (0.94-1.08)           | 0.77  |

Abbreviations: SHR, subdistribution hazards ratio; CI, confidence interval; ref., reference.

\*Subdistribution hazard estimates were obtained with the use of a proportional subdistribution hazards regression model fit to the inverse probability of treatment weighted with competing risks.

†A multivariable adjusted model further accounted for the following prognostic covariates: age at index date, sex, smoking, CHA<sub>2</sub>DS<sub>2</sub>-VASc score, comorbidities, including diabetes, hypertension, ischemic stroke, transient ischaemic attack, coronary artery disease, chronic kidney disease, peripheral vascular disease, venous thromboembolism, rheumatoid arthritis, systemic sclerosis, systemic lupus erythematosus, ankylosing spondylitis, liver cirrhosis, anaemia, cancer, gastrointestinal bleeding, dyslipidaemia, obesity and baseline use of non-vitamin K antagonist oral anticoagulant, warfarin, aspirin, beta-blockers, angiotensin-converting enzyme inhibitors/angiotensin receptor blockers, ablation, cardioversion.

Figure S1. Flow chart of study cohort selection.

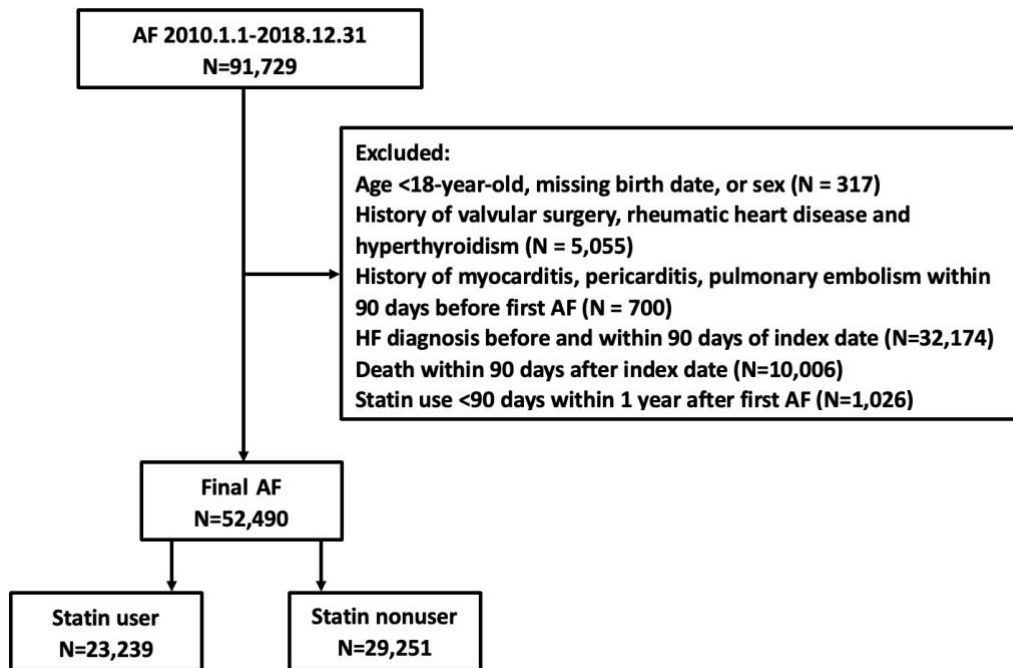

Abbreviation: AF, atrial fibrillation; HF, heart failure.

Figure S2. Restricted cubic spline for the association between LDL and incident heart failure.

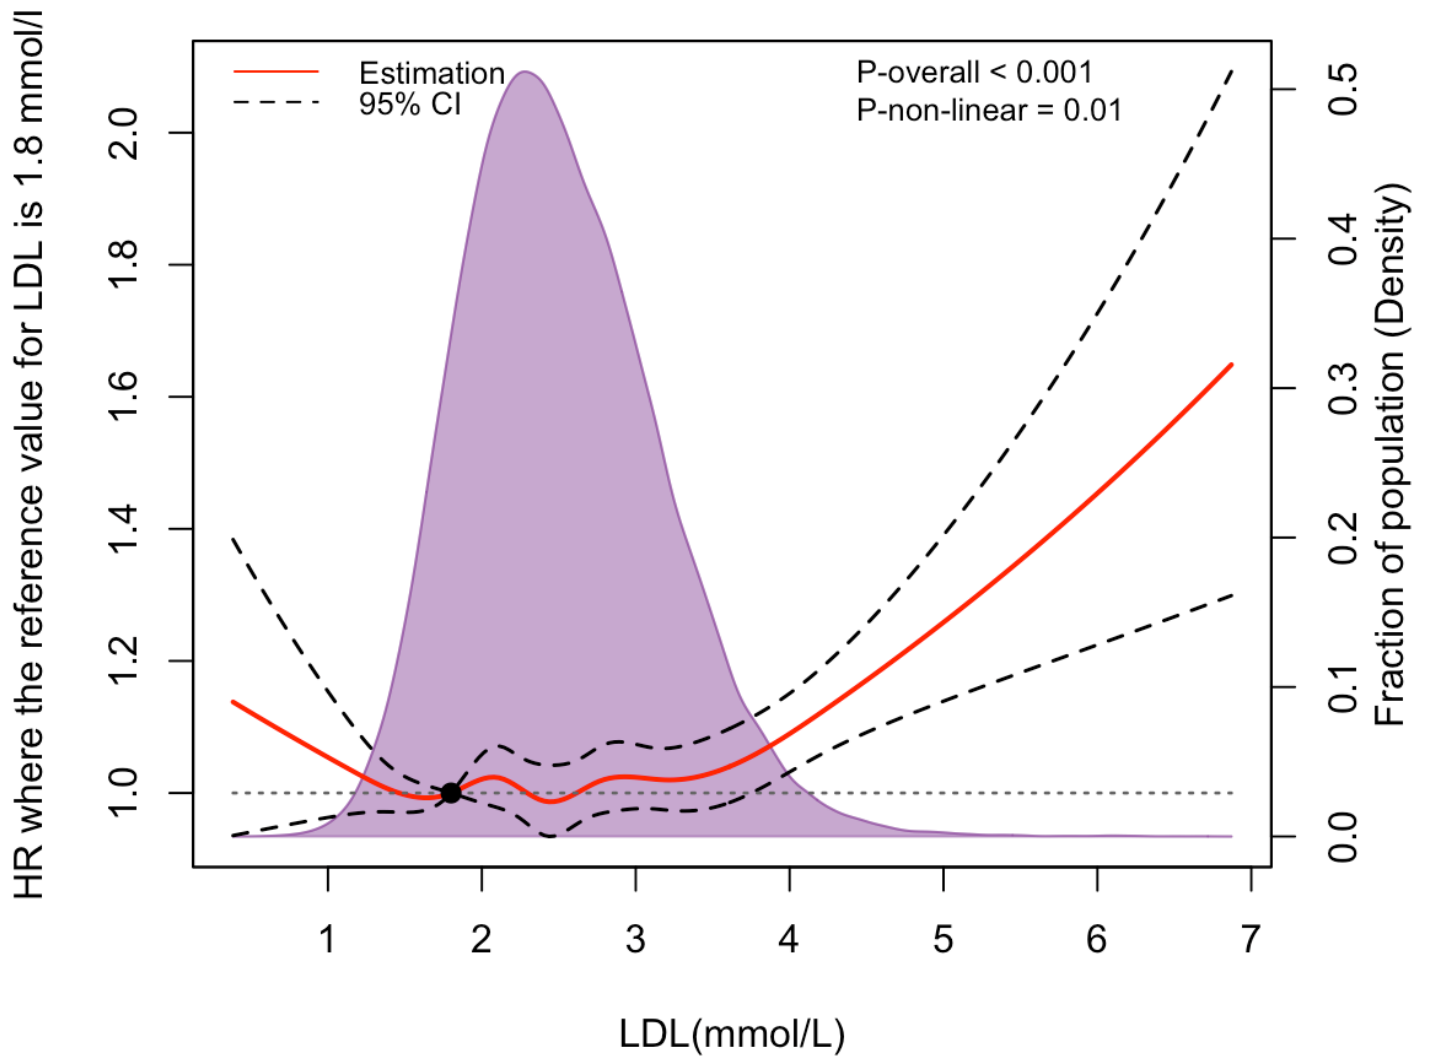

Abbreviation: LDL, low-density lipoprotein.
